# Supplementary material for: Loss of ATRX, associated with DNA methylation pattern of chromosome end, impacted biological behaviors of astrocytic tumors
Source: PubMed Central journal article supplement (PMC4627238; doi:10.18632/oncotarget.3906), 2015-05-04
Supplement: oncotarget-06-18105-s001.pdf [file oncotarget-06-18105-s001.pdf]

## SUPPLEMENTARY FIGURES AND TABLES

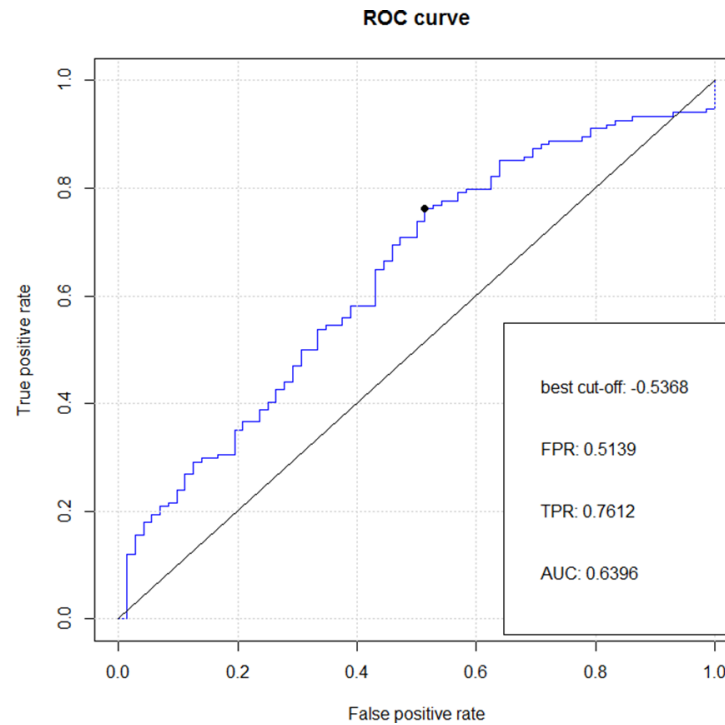

**Supplementary Figure 1:** The *ATRX* expression threshold was determined by receiver operating characteristics (ROC) analysis with an area under the curve of 0.6396.

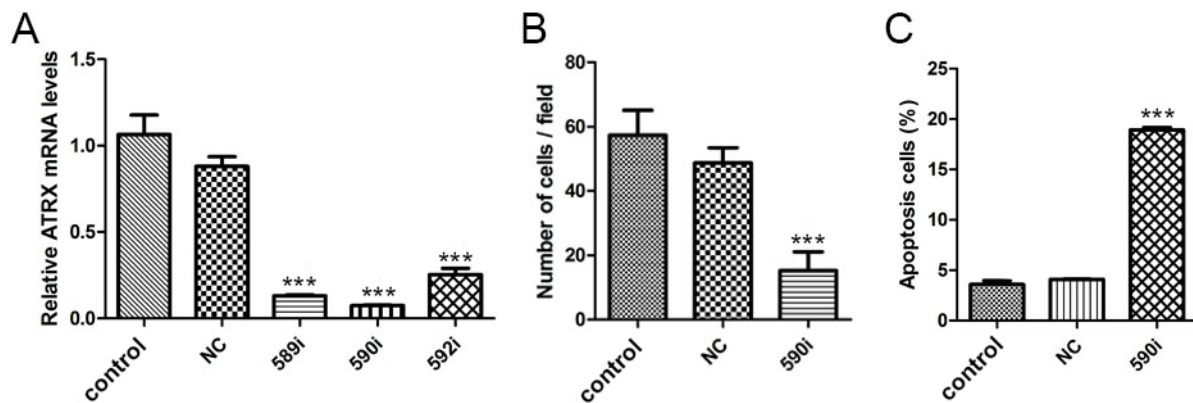

**Supplementary Figure 2:** The knockdown of *ATRX* affected migration and apoptosis of LN229 cells. Real-time PCR analysis of the *ATRX* mRNA level in the LN229 cells that were untreated or transfected with 590i or negative control **A**. The number of migrated cells in LN229 cells transfected with 590i was greatly reduced contrasted with control and NC **B**. A statistical analysis of the flow cytometry assays of the annexin V and PI levels in the LN229 cells that were untreated or transfected with 590i or negative control **C**. Data are presented as the means  $\pm$  S.D. from three independent experiments. \* $p < 0.05$ , \*\* $p < 0.01$  and \*\*\* $p < 0.001$ .

Supplementary Table 1: Clinicopathological characteristics of 208 patients with astrocytic tumors

| <i>Characteristic</i>                | <i>ATRX-low</i> | <i>ATRX-high</i> | <i>p-value</i> |
|--------------------------------------|-----------------|------------------|----------------|
| <b><i>Age at diagnosis</i></b>       |                 |                  |                |
| < 45                                 | 53              | 61               | < 0.0001       |
| ≥ 45                                 | 16              | 78               |                |
| <b><i>Gender</i></b>                 |                 |                  |                |
| Male                                 | 38              | 91               | 0.1726         |
| Female                               | 31              | 48               |                |
| <b><i>Preoperative KPS score</i></b> |                 |                  |                |
| ≥ 80                                 | 39              | 73               | 0.05           |
| < 80                                 | 16              | 61               |                |
| NA                                   | 14              | 5                |                |
| <b><i>Histology &amp; Grade</i></b>  |                 |                  |                |
| Astrocytoma (A, II)                  | 41              | 24               | < 0.0001       |
| Anaplastic astrocytoma (AA, III)     | 4               | 11               |                |
| Primary glioblastoma (pGBM,IV)       | 19              | 99               |                |
| Secondary glioblastoma (sGBM,IV)     | 5               | 5                |                |
| <b><i>TCGA Subtypes</i></b>          |                 |                  |                |
| Proneural                            | 31              | 19               | < 0.0001       |
| Neural                               | 12              | 30               |                |
| Classical                            | 7               | 11               |                |
| Mesenchymal                          | 19              | 79               |                |
| <b><i>Resection</i></b>              |                 |                  |                |
| Total                                | 28              | 60               | 1              |
| Subtotal                             | 36              | 77               |                |
| NA                                   | 5               | 2                |                |
| <b><i>Radiotherapy</i></b>           |                 |                  |                |
| Yes                                  | 49              | 106              | 0.4488         |
| No                                   | 15              | 24               |                |
| NA                                   | 5               | 9                |                |
| <b><i>TMZ Chemotherapy</i></b>       |                 |                  |                |
| Yes                                  | 26              | 73               | 0.0834         |
| No                                   | 34              | 53               |                |
| NA                                   | 9               | 13               |                |
| <b><i>IDH1/2 mutation</i></b>        |                 |                  |                |
| Mutation                             | 51              | 24               | < 0.0001       |
| Wildtype                             | 16              | 114              |                |
| NA                                   | 2               | 1                |                |

Abbreviations: KPS, Karnofsky performance status, NA, not available.

**Supplementary Table 2: Factors associated with OS in the Cox regression analysis for patients**

| <i>Variables</i>              | <i>Univariate Cox Regression</i> |              |                | <i>Multivariate Cox Regression</i> |              |                |
|-------------------------------|----------------------------------|--------------|----------------|------------------------------------|--------------|----------------|
|                               | <i>HR</i>                        | <i>95%CI</i> | <i>p value</i> | <i>HR</i>                          | <i>95%CI</i> | <i>p value</i> |
| <i>ATRX</i>                   | 2.332                            | 1.564–3.479  | < 0.0001       | 1.802                              | 1.144–2.839  | 0.011          |
| <i>Age</i>                    | 2.193                            | 1.552–3.099  | < 0.0001       | 1.852                              | 1.260–2.724  | 0.002          |
| <i>Preoperative KPS score</i> | 0.958                            | 0.947–0.969  | < 0.0001       | 0.957                              | 0.945–0.969  | < 0.0001       |
| <i>Resection</i>              | 1.381                            | 1.014–1.881  | 0.041          | 1.423                              | 1.000–2.027  | 0.05           |
| <i>Radiotherapy</i>           | 1.691                            | 1.116–2.561  | 0.013          | 3.158                              | 1.999–4.990  | < 0.0001       |
| <i>Chemotherapy</i>           | 0.854                            | 0.602–1.213  | 0.378          |                                    |              |                |
| <i>Gender</i>                 | 0.871                            | 0.613–1.238  | 0.442          |                                    |              |                |

Abbreviations: KPS, Karnofsky performance status; OS, overall survival.
